# Supplementary material for: Are Dual-Purpose Chickens Twice as Good? Measuring Performance and Animal Welfare throughout the Fattening Period
Source: PubMed Central journal article supplement (PMC7692664; doi:10.3390/ani10111980), 2020-10-28
Supplement: animals-10-01980-s001.pdf [file animals-10-01980-s001.pdf]

TABLE 1 QUALITATIVE BEHAVIOR ASSESSMENT

**Table S1:** Presented are the mean values of the Area under curve (AUC) per term of the Qualitative Behavior Assessment over the whole assessment period of 20 weeks. Means  $\pm$  SE are given per genotype (Lohmann Brown LB, Lohmann Dual LD, Rhinelander RL), including statistics. The highest possible value would be 4.828 based on calculations with minimum vs. maximum VAS value. For details, see the Methodology section.

|                        | Mean $\pm$ SE   |                 |                 | F<br>(2;51) | $\eta^2$<br>N = 18 | P<br>$\alpha = 0.05^*$ | Post-Hoc<br>0.01** 0.001***        |
|------------------------|-----------------|-----------------|-----------------|-------------|--------------------|------------------------|------------------------------------|
|                        | LB              | LD              | RL              |             |                    |                        |                                    |
| Active                 | 4.40 $\pm$ 0.05 | 4.19 $\pm$ 0.07 | 4.11 $\pm$ 0.12 | 3.259       | 0.113              | 0.047*                 | LB – LD = 0.049                    |
| Energetic              | 4.40 $\pm$ 0.05 | 4.13 $\pm$ 0.11 | 4.24 $\pm$ 0.11 | 2.110       | 0.076              | 0.132                  |                                    |
| Playful                | 4.27 $\pm$ 0.08 | 4.03 $\pm$ 0.07 | 3.49 $\pm$ 0.08 | 27.648      | 0.520              | $\leq 0.001^{***}$     | LB – RH < 0.001<br>LD – RH < 0.001 |
| Confident              | 4.64 $\pm$ 0.06 | 4.63 $\pm$ 0.06 | 4.30 $\pm$ 0.16 | 3.483       | 0.120              | 0.038*                 |                                    |
| Content                | 0.44 $\pm$ 0.07 | 4.33 $\pm$ 0.10 | 4.41 $\pm$ 0.07 | 0.408       | 0.016              | 0.667                  |                                    |
| Friendly               | 4.61 $\pm$ 0.05 | 4.59 $\pm$ 0.04 | 4.39 $\pm$ 0.08 | 3.807       | 0.130              | 0.029*                 | LB – RH = 0.048                    |
| Positively<br>Occupied | 4.67 $\pm$ 0.04 | 4.65 $\pm$ 0.05 | 4.51 $\pm$ 0.06 | 3.061       | 0.107              | 0.056                  |                                    |
| Calm                   | 3.61 $\pm$ 0.13 | 3.96 $\pm$ 0.10 | 3.82 $\pm$ 0.07 | 3.104       | 0.109              | 0.053                  |                                    |
| Comfortable            | 4.27 $\pm$ 0.06 | 4.10 $\pm$ 0.09 | 4.32 $\pm$ 0.05 | 2.659       | 0.094              | 0.080                  |                                    |
| Drowsy                 | 3.18 $\pm$ 0.18 | 3.49 $\pm$ 0.15 | 3.62 $\pm$ 0.17 | 1.827       | 0.067              | 0.171                  |                                    |
| Relaxed                | 4.08 $\pm$ 0.07 | 4.25 $\pm$ 0.07 | 4.13 $\pm$ 0.06 | 1.611       | 0.059              | 0.210                  |                                    |
| Bored                  | 3.06 $\pm$ 0.40 | 3.57 $\pm$ 0.26 | 2.68 $\pm$ 0.25 | 2.044       | 0.074              | 0.140                  |                                    |
| Depressed              | 0.17 $\pm$ 0.17 | 0.52 $\pm$ 0.28 | 0.35 $\pm$ 0.24 | 0.555       | 0.021              | 0.578                  |                                    |
| Frustrated             | 1.03 $\pm$ 0.29 | 1.21 $\pm$ 0.34 | 0.32 $\pm$ 0.22 | 2.694       | 0.095              | 0.077                  |                                    |
| Tense                  | 0.86 $\pm$ 0.30 | 1.49 $\pm$ 0.27 | 1.72 $\pm$ 0.31 | 2.297       | 0.083              | 0.111                  |                                    |
| Agitated               | 1.16 $\pm$ 0.28 | 1.43 $\pm$ 0.30 | 2.03 $\pm$ 0.33 | 2.166       | 0.078              | 0.125                  |                                    |
| Helpless               | 0.33 $\pm$ 0.18 | 0.24 $\pm$ 0.17 | 0.29 $\pm$ 0.20 | 0.060       | 0.002              | 0.942                  |                                    |
| Nervous                | 0.54 $\pm$ 0.22 | 0.36 $\pm$ 0.20 | 0.69 $\pm$ 0.29 | 0.498       | 0.019              | 0.610                  |                                    |
| Unsure                 | 0.42 $\pm$ 0.24 | 0.29 $\pm$ 0.20 | 1.34 $\pm$ 0.35 | 4.492       | 0.150              | 0.016*                 | LD – RH = 0.024                    |
| Distressed             | 0.26 $\pm$ 0.18 | 0.33 $\pm$ 0.23 | 0.80 $\pm$ 0.32 | 1.381       | 0.051              | 0.260                  |                                    |
| Fearful                | 1.60 $\pm$ 0.27 | 2.06 $\pm$ 0.20 | 3.59 $\pm$ 0.11 | 0.511       | 26.655             | $\leq 0.001^{***}$     | LB – RH < 0.001<br>LD – RH < 0.001 |
| Scared                 | 0.13 $\pm$ 0.13 | 0.29 $\pm$ 0.20 | 0.47 $\pm$ 0.33 | 0.540       | 0.021              | 0.586                  |                                    |

TABLE 2 WEIGHTS

**Table S2:** Averaged weights [g] for cocks per genotype and week of life (mean  $\pm$  SE) throughout the fattening period. Exceeding of the 2-kg limit in live weight is marked.

| <b>Week of life</b> | <b>Lohmann Dual</b>                | <b>Lohmann Brown</b>               | <b>Rhineland</b>                   |
|---------------------|------------------------------------|------------------------------------|------------------------------------|
| Hatching            | 43 $\pm$ 0.6                       | 39 $\pm$ 0.6                       | 39.0 $\pm$ 1.0                     |
| 1                   | 121 $\pm$ 1.8                      | 81 $\pm$ 1.2                       | 78.0 $\pm$ 4.8                     |
| 2                   | 251 $\pm$ 4.3                      | 154 $\pm$ 2.0                      | 126 $\pm$ 10.5                     |
| 3                   | 438 $\pm$ 7.6                      | 260 $\pm$ 3.3                      | 202 $\pm$ 7.0                      |
| 4                   | 675 $\pm$ 13.2                     | 396 $\pm$ 5.5                      | 316 $\pm$ 10.5                     |
| 5                   | 949 $\pm$ 13.8                     | 522 $\pm$ 8.3                      | 427 $\pm$ 14.9                     |
| 6                   | 1,243 $\pm$ 18.4                   | 707 $\pm$ 8.4                      | 604 $\pm$ 24.5                     |
| 7                   | 1,576 $\pm$ 26.1                   | 906 $\pm$ 10.7                     | 747 $\pm$ 30.0                     |
| 8                   | 1,905 $\pm$ 34.7                   | 1,106 $\pm$ 13.3                   | 931 $\pm$ 28.4                     |
| 9                   | <u>2,242 <math>\pm</math> 33.0</u> | 1,320 $\pm$ 16.0                   | 1,125 $\pm$ 34.1                   |
| 10                  | 2,565 $\pm$ 41.4                   | 1,517 $\pm$ 28.8                   | 1,307 $\pm$ 41.2                   |
| 11                  | 2,894 $\pm$ 60.4                   | 1,769 $\pm$ 26.1                   | 1,522 $\pm$ 49.3                   |
| 12                  | 3,150 $\pm$ 47.7                   | 1,975 $\pm$ 27.6                   | 1,620 $\pm$ 43.4                   |
| 13                  | 3,333 $\pm$ 49.7                   | <u>2,027 <math>\pm</math> 28.0</u> | 1,818 $\pm$ 59.7                   |
| 14                  | 3,454 $\pm$ 47.4                   | 2,192 $\pm$ 30.0                   | 1,904 $\pm$ 62.9                   |
| 15                  | 3,651 $\pm$ 60.9                   | 2,297 $\pm$ 27.7                   | <u>2,164 <math>\pm</math> 66.2</u> |
| 16                  | 3,734 $\pm$ 64.3                   | 2,497 $\pm$ 32.3                   | 2,236 $\pm$ 80.6                   |
| 17                  | 3,919 $\pm$ 60.9                   | 2,612 $\pm$ 31.6                   | 2,299 $\pm$ 75.2                   |
| 18                  | 4,057 $\pm$ 60.7                   | 2,741 $\pm$ 34.0                   | 2,441 $\pm$ 82.7                   |
| 19                  | 4,063 $\pm$ 62.8                   | 2,827 $\pm$ 36.6                   | 2,488 $\pm$ 81.7                   |
| 20                  | 4,071 $\pm$ 47.9                   | 2,893 $\pm$ 29.3                   | 2,454 $\pm$ 65.8                   |

TABLE 3 DAILY WEIGHT GAIN

**Table S3:** Daily weight gain as mean (M)  $\pm$  standard error (SE) for each experimental group, focal (F) and random (R) weighed animals per genotype and week of life. Stars indicate maximum daily weight gain.

| Week of life | Lohmann Dual     |         |          | Lohmann Brown    |         |          | Rhineland        |         |          |
|--------------|------------------|---------|----------|------------------|---------|----------|------------------|---------|----------|
|              | F_M $\pm$ SE [g] | R_M [g] | LD_M [g] | F_M $\pm$ SE [g] | R_M [g] | LB_M [g] | F_M $\pm$ SE [g] | R_M [g] | RL_M [g] |
| 1            | 11.84 $\pm$ 0.20 | 10.58   | 11.21    | 6.36 $\pm$ 0.14  | 5.75    | 6.05     | 3.94 $\pm$ 0.25  |         | 1.97     |
| 2            | 19.51 $\pm$ 0.40 | 17.58   | 18.54    | 10.19 $\pm$ 0.14 | 10.56   | 10.37    | 7.29 $\pm$ 0.39  | 6.48    | 6.88     |
| 3            | 28.72 $\pm$ 0.45 | 24.79   | 26.76    | 14.93 $\pm$ 0.24 | 15.43   | 15.18    | 11.52 $\pm$ 0.53 | 10.31   | 10.92    |
| 4            | 35.40 $\pm$ 0.70 | 32.39   | 33.89    | 19.22 $\pm$ 0.37 | 19.54   | 19.38    | 14.36 $\pm$ 0.52 | 18.13   | 16.24    |
| 5            | 38.71 $\pm$ 1.08 | 38.61   | 38.66    | 17.72 $\pm$ 0.46 | 18.33   | 18.02    | 16.26 $\pm$ 0.79 | 15.47   | 15.86    |
| 6            | 42.97 $\pm$ 1.42 | 41.65   | 42.31    | 26.70 $\pm$ 0.53 | 26.24   | 26.47    | 21.67 $\pm$ 0.97 | 28.73   | 25.20    |
| 7            | 52.55 $\pm$ 1.48 | 42.56   | 47.55    | 28.33 $\pm$ 0.50 | 28.46   | 28.39    | 23.69 $\pm$ 1.25 | 17.30   | 20.50    |
| 8            | 46.15 $\pm$ 3.90 | 48.06   | 47.11    | 29.97 $\pm$ 0.50 | 27.18   | 28.57    | 27.83 $\pm$ 2.85 | 24.70   | 26.26    |
| 9            | 50.11 $\pm$ 3.87 | 46.01   | 48.06*   | 30.11 $\pm$ 0.84 | 30.96   | 30.53    | 24.49 $\pm$ 3.38 | 30.99   | 27.74    |
| 10           | 48.64 $\pm$ 2.29 | 41.47   | 45.05    | 27.28 $\pm$ 2.00 | 28.96   | 28.12    | 28.00 $\pm$ 1.29 | 22.84   | 25.42    |
| 11           | 52.89 $\pm$ 3.05 | 40.90   | 46.90    | 36.96 $\pm$ 3.80 | 33.40   | 35.18*   | 24.40 $\pm$ 1.45 | 38.44   | 31.42    |
| 12           | 33.36 $\pm$ 2.24 | 39.89   | 36.63    | 30.36 $\pm$ 1.20 | 28.67   | 29.51    | 19.96 $\pm$ 1.93 | 7.90    | 13.93    |
| 13           | 26.49 $\pm$ 3.02 | 25.83   | 26.16    | 3.75 $\pm$ 1.30  | 10.93   | 7.34     | 26.06 $\pm$ 1.47 | 30.67   | 28.37    |
| 14           | 16.29 $\pm$ 1.49 | 18.23   | 17.26    | 26.46 $\pm$ 1.01 | 20.88   | 23.67    | 20.44 $\pm$ 2.16 | 3.97    | 12.21    |
| 15           | 29.32 $\pm$ 1.84 | 27.06   | 28.19    | 11.58 $\pm$ 1.16 | 18.24   | 14.91    | 29.23 $\pm$ 4.44 | 45.02   | 37.13*   |
| 16           | 16.56 $\pm$ 2.21 | 7.20    | 11.88    | 29.79 $\pm$ 1.57 | 27.52   | 28.65    | 10.17 $\pm$ 2.81 | 10.68   | 10.43    |
| 17           | 26.32 $\pm$ 2.12 | 26.48   | 26.40    | 20.48 $\pm$ 0.92 | 12.34   | 16.41    | 11.83 $\pm$ 2.91 | 4.80    | 8.31     |
| 18           | 15.05 $\pm$ 2.25 | 24.45   | 19.75    | 14.58 $\pm$ 1.71 | 22.12   | 18.35    | 19.01 $\pm$ 1.80 | 18.93   | 18.97    |
| 19           | 2.49 $\pm$ 1.96  | -0.95   | 0.77     | 15.96 $\pm$ 1.45 | 8.71    | 12.33    | 6.57 $\pm$ 1.46  | 6.71    | 6.64     |
| 20           | -0.40 $\pm$ 1.58 | 2.79    | 1.19     | 7.09 $\pm$ 1.85  | 11.69   | 9.39     | 4.22 $\pm$ 3.90  | -8.18   | -1.98    |
| M            | 29.65 $\pm$ 1.88 | 27.78   | 28.71    | 20.39 $\pm$ 1.08 | 20.29   | 20.34    | 17.55 $\pm$ 1.83 | 17.57   | 17.12    |

TABLE 4 PRINCIPAL COMPONENT ANALYSIS

**Table S4:** Loading terms on component 1 and 2 in the principal component analysis.

| <b>Terms</b>        | <b>Component 1</b> | <b>Loading</b> | <b>Term</b> | <b>Component 2</b> |
|---------------------|--------------------|----------------|-------------|--------------------|
| Depressed           | 0.902              | Positive       | Fearful     | 0.586              |
| Helpless            | 0.900              |                | Comfortable | 0.530              |
| Unsure              | 0.888              |                |             |                    |
| Scared              | 0.866              |                |             |                    |
| Distressed          | 0.865              |                |             |                    |
| Nervous             | 0.844              |                |             |                    |
| Frustrated          | 0.748              |                |             |                    |
| Agitated            | 0.679              |                |             |                    |
| Drowsy              | 0.670              |                |             |                    |
| Tense               | 0.620              |                |             |                    |
| Confident           | -0.882             | Negative       | Bored       | -0.833             |
| Positively Occupied | -0.770             |                | Playful     | -0.361             |
| Content             | -0.768             |                | Calm        | -0.339             |
| Friendly            | -0.757             |                |             |                    |
| Active              | -0.705             |                |             |                    |
| Energetic           | -0.587             |                |             |                    |
| Relaxed             | -0.419             |                |             |                    |
